# Supplementary material for: Plant Spacing Effects on Stem Development and Secondary Growth in Nicotiana tabacum
Source: MDPI journal article supplement (doi:10.3390/agronomy13082142), 2023-08-16
Supplement: s1 [file s1]

**Supplementary File S1. Sequences used in phylogenetic tree.**

>AtHB8

MGGGSNNSHNMDNGKYVRYTPEQVEALERLYNDCPKPSSMRRQQLIRECPIL  
SNIEPKQIKVWFQNRRCREKQRKEASRLQAVNRKLTAMNKLLMEENDRLQK  
QVSHLVYENSYFRQHPQNQGNLATTTDTSCEVVTSGQHHLTPQHQP RDASPA  
GLLSIADETLTEFISKATGTAVEWVQMPGMPKPGPDSIGIVAISHGCTGIAARAC  
GLVGLDPTRVAEILKDKPCWLRDCRSLDIVNVLSTANGGTLELIYMQLYAPT  
TLAPARDFWMLRYTSVMEDGSLVICERSLNNTQNGPSMPPSPHFVRAEILPSG  
YLIRPCEGGGSILHIVDHFDPWSVPEVLRSLYESSTLLAQRTTMAALRYLR  
QISQEISQPNVTGWGRRPAALRALSQLSKGFNEAVNGFSDEGWSILES DGID  
DVTLLVNSSPTKMMMTSSLPFANGYTSMPSAVLCASMLLQNVPPSILLRF  
LREHRQEWADNSIDAYSAAAIKAGPCSLPIPRPGSFGGQVILPLAHTIENEEFM  
EVIKLESLGHYQEDMMMPADIFLLQMC SGVDENAVESCAELIFAPIDASFSDD  
APIIPSGFRIIPLDSKSEGLSPNRTLDLASALDVGSRTAGDSCGSRGNSKSVMTI  
AFQLAFEMHMQENVASMARQYVRSVIASVQRVALALSPSSHQLSGLRPPPAS  
PEAHTLARWISHSYRCYLGVDLLKPHGTDLLKSLWHPDAVMCCSLKALSP  
VFTFANQAGLDMLETTLVALQDITLDKIFDNNNGKKTLSSEFPQIMQQGFMC  
MDGGICMSSMGRAVTYEKAVGWKVLNDDDEPHCICFMFLNWSFI

>AtHB15

MAMSKDGLGCLDNGKYVRYTPEQVEALERLYHDCPKPSSIRRQQLIRECP  
ILSNIEPKQIKVWFQNRRCREKQRKEASRLQAVNRKLTAMNKLLMEENDRLQ  
KQVSQLVHENSYFRQHTPNPSLPKDTSCESVVTSGQHQLASQNPQRDASPA  
GLLSIAEETLAEFLSKATGTAVEWVQMPGMPKPGPDSIGIIAISHGCTGVAARA  
CGLVGLEPTRVAEIVKDRPSWFRECR AVEVMNVLP TANGGTVELLYMQLYA  
PTTLAPPRDFWLLRYTSVLEDGSLVVCERSLKSTQNGPSMPLVQNFVRAEML  
SSGYLIRPCDGGGSIHIVDHMDLEACSVPEVLRPLYESPKVLAQKTTMAALR  
QLKQIAQEV TQTNSSVNGWGRRPAALRALSQLSRGFNEAVNGFTDEGWSVI  
GDSMDDVTITVNSSPDKLMGLNLTFANGFAPVSNVVLCAKASMLLQNVPPAI  
LLRFLREHRSEWADNNIDAYLAAAVKVGPCSARVGGFGGQVILPLAHTIEHE  
EFMEVIKLEGLGHSPEDAIVPRDIFLLQLCSGMDENAVGTCAELIFAPIDASFA  
DDAPLLPSGFRIIPLDSAKQEVSSPNRTLDLASALEIGSAGTKASTDQSGNSTC  
ARSVMTIAFEFGIESHMQEHVASMARQYVRGISSVQRVALALSPSHISSQVGL  
RTPLGTPEAQTLARWICQSYRGYMGVELLKSNSDGNESILKNLWHHTDAIICC  
SMKALPVFTFANQAGLDMLETTLVALQDISLEKIFDDNGRKTLCSEFPQIMQQ  
GFACLQGGICLSSMGRPVS YERAVAWKVLNEEENAH CICFVFINWSFV

>NtHB8sy

MMAVTSACKDSKMGMDNGKYVRYTPEQVEALERLYHECPKPSSLRRQQLIR  
ECPILSNIEPKQIKVWFQNRRCREKQRKESSRLQAVNRKLTAMNKLLMEEND  
RLQKQVSQLVYENSFFRQQTQTAALTTTDNNSCESVVTSGQQNLSAQRPPRD  
ASPAGLLSLAEETLTEFLSKATGTAVEWVQMPGMPKPGPDSIGITAISHSCSGV  
ASRACGLVGLEPTRVAEILKDRPSWFRDCRAVDVLNVMSTGSGGTIELLYMQ  
LYAPTTLAPARDFWLMRYTSVMEDGSLVVCERSLNNTQNGPSMPPVQNFVR  
AELLPSGYLIRPCEGGGSIHIVDHMDLEPWSVPEVLRPLYESSTVLSQRTTMA  
ALRHRLRQISQESHPTVTGWGRRPAALRALGQRLSKGFNEAVNGFTDEGWSM

LESDGIDDVTLNVNSSPSKLMGANISYANGFPSMSSAVLCAKASMLLQNVPP  
AILLRFLREHRSEWADSGIDAYSAAAVKAGPCSIPVTRTGCFGGQIILPLAHTIE  
HEEFMEVIRLESIGHYQDDMIMPGDIFLLQLCSGVDENAVGTCAELVFAPIDA  
SFADDAPLLPSGFRIIPLDSKADASSPNRTLDLASTLEVGPAGSRPNGDYSKN  
SSSTKSVMTIAFQFAFEIHLQENIAAMARQYVRSIISSVQRVALALSPSRLGSLP  
GLRSPPGTPEAQTLARWICQSYRFFLGVELLKS SVSGGSESVLKEIWHHSDALM  
CCSLKALPVFTFANEAGLDMLETTLVSLQDITLEKIFDDNGRKALFSELPQIM  
QQGFACLQGGICLSSMGRPISYERAIAWKVLNEEEDPHCICFMFVNWSFV

>NtHB8to

MMAVTSACKDSKMGMDNGKYVRYTPEQVEALERLYHECPKPSSLRRQQLIR  
ECPILSNIEPKQIKVWFQNRRCREKQRKESSRLQAVNRKLTAMNKLLMEEND  
RLQKQVSQLVYENGFFRQQTQTAALTTTDNNSCESVVTSGQQNVSAQRPPRD  
ASPAGLLSLAEETLTEFLSKATGTAVEWVQMPGMPGPD SIGIIAISHSCSGVA  
SRACGLVGLEPTRVAEILKDRSSWFRDCRAVDVLNVMSTGSGGTIELLYMQL  
YAPTTLAPARDFWLMRYTSVTEGSLVVCERSLNNTQNGPSMPPVQNFVRA  
ELLPSGYLIRPCEGGGSIHIVDHMDLEPWSVPEVLRPLYESSVLSQRTTMAA  
LRHLRQISQESHPTVTGWGRRPAALRALGQRLSKGFNEAVNGFTDEGWSML  
ESDGIDDVTLNVNSSPSKLMGANISYANGFPSMSSAVLCAKASMLLQNVPPVI  
LLRFLREHRSEWADSGIDAYSAAAVKAGPCSIPVTRTGSFGGQIILPLSHTIEHE  
EFMEVIRLESIGHYQDDMIMPGDIFLLQLCSGVDENAVGTCAELVFAPIDAS  
FADDAPLLPSGFRIIPLDSKADASSPNRTLDLASTLEVGPAGSRPNGDYSKNSGS  
TKSVMTIAFQFAFEIHLQENIAAMARQYVRSIISSVQRVALALSPSRLGSLPGL  
RSPPGTPEAQTLARWICQSYRFFLGVELLKS SVGGGSESVLKEIWHHSDALMCC  
SLKALPVFTFANEAGLDMLETTLVSLQDITLEKIFDDNGRKTLFSELPQIMQQ  
GFACLQGGICLSSMGRPISYERAVAWKVLNEEEDPHCLCFMFINWSFV

>NtHB15sy1

MASCKDGKTSSVMDNGKYVRYTPEQVEALERLYHDCPKPSSMRRQQLIREC  
PILSHIEPKQIKVWFQNRRCREKQRKEASRLQAVNRKLTAMNKLLMEENDRL  
QKQVSQLVYENGYFRRQTHSTTLATKDTSCESVVTSGQHHLTSQHPPRDASP  
AGLLSIAEETLAEFLSKATGTAVEWVQMPGMPGPD SIGIIAISHGCTGVAAR  
ACGLVGLEPTRVAEILKDRPSWFRDCRAVDVLNVLPTANGGTIELLYMQLYA  
PTTLAPARDFWLLRYTTVMDDGSLVVCERSLGNTQNGPSMPPVQNFVRAEIL  
PSGYLIRPCEGGGSIHIVDHMNLEAWSVPEVLRPLYESSAVLAQKTTVAALR  
YLRQIAQEVSQTNVSNWGRRPAALRALSQRLSRGFNEALNGLTDEGWSMLG  
SDGMDDITILVNSSPDKLMGLNLSFANGFSSLSNAVMCAKASMLLQNVPPAIL  
LRFLREHRSEWADNNIDAYSAAAIVGPPCLPGTRVGNFGGQVILPLAHTVE  
HEELLEVIKLEGVGHSPEDAIMPRDMFLLQLCSGMDENAVGTS AELIFAPIDA  
SFADDAPLLPSGFRIISLES GKESSSPNRTLDTSALETGPAENKVGNDLHTNG  
GTSRSVMTIAFQFAFESHMQENVASMARQYVRSIISSVQRVALALSPSHLGSH  
GGLRLPLGTPEAHTLARWIFQSYRCFLGVELLKSIAEGSESVLKEIWHHSDAIL  
CCSAKAMPVFTFANQAGLDMLETTLVSLQDITLEKIFDDH GKKNLCTEFPQI  
MQQGFACLQGGICLSSMSRPISYERAVAWKVMNEEDSPHCICFMFVNWSFV

>NtHB15to1

MASCKDGKTSSVLDNGKYVRYTPEQVEALERLYHDCPKPTSMRRQQLIRECP

ILSNIEPKQIKVWFQNRRCREKQRKEASRLQAVNRKLTAMNKLLMEENDRLQ  
KQVSQLVYENGYFRRQTHSTTLATKDTSCESVVTSSQHHLTSQHPPRDASPA  
GLLSIAEETLTEFLSKATGTAVEWVQMPGMKPGPDSIGIIAISHGCTGVAARA  
CGLVGLEPTRVAEILKDRPSWFRDCRAVDALNVLP TANGGTIELLYMQLYAP  
TTLAPARDFWLLRYTTVMDDGSLVVCERSLGNTQNGPSMPPVQNFVRAEILP  
SGYLIRPCEGGGSIIHIVDHMNLEAWSVPEVLRPLYESSAVLAQKTTVAALRY  
LRQIAQEVSQTNVTNWGRRPAALRALSQLSRGFNEALNGLTDEGWSMLGS  
DGMDDITILVNSSPDKLMGLNLSFANGFSSLSNAVMCAKASMLLQNVPPAIL  
LRFLREHRSEWADNNIDAYSAAAIVKGPCCLPGAQVGNFGGQVILPLAHTVE  
HEELLEVIKLEGVGHSPEDTIMPRDMFLLQLCSGMDENAVGTS AELIFAPIDAS  
FADDAPLLPSGFRIISLESKLESSPNRTLDTSALETGPAENKVGNDLHTNGG  
TSRSVMTIAFQFAFESHMQENVASMARQYVRSIISVQRVALALSPSHLGSHG  
GLRLPLGTPEAHTLARWICQSYRCFLGVELLKSIAEGSDSILKSLWHHSDAII  
CSAKALPVFTFANQAGLDMLETTLVALQDITLEKIFDDHGKKNLCTEFPQIMQ  
QGFACLQGGICLSSMSRPISYERAVAWKVMNEEDSPHCICFMFVNWSFV

>NtHB15sy2

MSMSCKDGKSVDDNGKYVRYTPEQVEALERLYHECPKPSSMRRQQLIRECPI  
LSHIEPRQIKVWFQNRRCREKQRKESSRLQGVNRKLSAMNKLLMEENDRLQ  
KQVSQLVYENGYFRKQTQTTKIASKDTSCESVVTSGQHHLTPQHPPRDASPA  
GLLSIAEETLTEFLSKATGTAVEWVQMPGMKPGPDSIGIIAISHGCTGMAARA  
CGLVGLDPTRVAEILKDRPSWYRDCRAVEVLNLPTANGGTIELLYMQLYAPT  
TLAPPRDFWLLRYSTVMDDGSLVVCERSLGNTQNGPSMPPVPNFVRAEMLPS  
GYLIRPCEGGGSIVHIVDHMDLEAWSVPEVLRPLYESSAVLAQKTSMAALRQ  
LRQITLEASQPNVTNWGRRPAALRALSKKLSRGFNEALNGFSSEGWSMRDND  
GMDDVTILVNSSPDKLMGLNLSFADEFTSLSNVLC AKASMLLQSVTPAVLL  
RFLREHRSEWVDNDIDAYAAA AVKVGPCSLPGARVCNFGGQVILPLAHTAE  
HEELLEVIKLEGVCHSPEDVIMPRDMFLLQMCSGMDENAVGTCAELIFAPIDA  
SFADDAPLLPSGFRIIPLDSAKEASSPNRTLDTSALEIGPAESKVANDFKSTGV  
TSKSIMTVAFQFAFESHMQENVASMARKYVRSFISSVQRVALALSPSHFGSLG  
GLRLHLGTPEAHTLARWICQSYRHYLGVELLKMSGEGSESVLESLWQHSDAI  
CCSAKALPVFTFANQAGLDMLETTLVALQDISLEKIFDEHGRKNLCSEFPQIM  
QQGFACLRGGICLSSMGRPVSYEKAVAWKVLNEEDNAHCISFMFVNWSFV

>NtHB15to2

MSMSCKDGKSVDDNGKYVRYTPEQVEALERLYHECPKPSSMRRQQLIRECPI  
LSHIEPRQIKVWFQNRRCREKQRKESSRLQGVNRKLSAMNKLLMEENDRLQ  
KQVSQLVYENGYFRKQTQTTKIASKDTSCESVVTSGQHHLAPQHPPRDASPA  
GLLSIAEETLTEFLSKATGTAVEWVQMPGMKPGPDSIGIIAISHGCTGMAARA  
CGLVGLDPTRVAEILKDRPSWYRDCRAVEVLNMLPTANGGTIELLYMQLYA  
PTTLAPPRDFWLLRYSTVMDDGSLVVCERSLGNTQNGPSMPPVQNFVRAEM  
LPSGYLIRPCEGGGSIVHIVDHMDLEAWSVPEVLRPLYESSAVLAQKTSMAAL  
RQLRQITLEASQPNVTNWGRRPAALRALSKKLSRGFNEALNGFSSEGWSMLD  
NDGMDDVTILVNSSPDKLMGLNLSFADEFTSLSNVLC AKASMLLQSVTPAV  
LLRFLREHRSEWVDSIDAYAAA AVKVGPCSLPGARVCNFGGQVILPLAHTA  
EHEELLEVIKLEGVCHSPEDVIMPRDMFLLQMCSGMDENAVGTCAELIFAPID

ASFADDAPLLPSGFRIIPLDSAKEASSPNRTLDTLSALEIGPAESKVVNDKSTG  
VTSKSIMTIAFQFAFESHMQENVASMARKYVRSFISSVQRVALALSPSHFGSL  
GGLRLPLGTPEAHTLARWICQSYRHYLGVELPKLSGEGSESVLES LWQHSDAI  
ICCSAKALPVFTFANQAGLDMLETTLVALQDISLEKIFDEHGRKNLCSEFPQIM  
QQGFACLRGGICLSSMGRPVSYEKAVAWKVVNEEDNAHCISFMFVNWSFI  
>PtrHB8

MDNGKYVRYTPEQVEALERLYHECPKPSSMRRQQLIRECPILSHIEPKQIKVW  
FQNRRCREKQRKEASRLQAVNRKLTAMNKLLMEENDRLQKQVSQLVYENS  
YFRQQTQ NATNLATTDTSCE SVVTSGQHHLTPQHPPRDAS PAGLLSIAEETLA  
QFLSKATGTAVEWVQMPGMKPGPDSIGIVAISHGCTGVAARACGLVGLEPTR  
VAEILKDRPSWFRDCRAVDVVNALSTGSGGTIELLYMQLYAPTTLAPARDFW  
LLRYTSVLEDGSLVVCERSLNNTQNGPSMPPTQHFVRAEMLPSGYLIRPCEGG  
GSIHVVDHMDLEPWSVPEVLRPLYESSTLLAQKTTMAALRHLRQVSQEV SQ  
PNVTGWGRRPAALRALSQLSKGFNEAVNGFADEGWSMLES DGIDDVTVLV  
NSSPAKMMGVNFSYANGFPSMSNAVLCAKASMLLQNVPPAILLRFLREHRSE  
WADSGIDAYAAA AVKAGPCSLPMSRAGNFGGQVILPLAHTIEHEEASTSFME  
VIKLENMGYREDMLMPGDVFLQLCSGVDENAVGTCAELIFAPIDASFSDDA  
PIIPSGFRIIPLDSGMDASSPNRTLDLASALEVGPAGNRASGDLSGRSGCTKSV  
MTIAFQFAFEMHLQENVASMARQYVRSIIASVQRVALALSPSHFGSHAGFRPP  
PGTPEAHTLARWICESYRCYLGVELLKNESSESILKTLWHHSDALMCCSLKT  
LPVFTFANQAGLDMLETTLVALQDITLEKIFDDNGRKTLYSEFPQIMQQGFMC  
LQGGICLSSMGRPVSYERAVAWKVLNEEESAHCICFMFINWSFV

>PtrHB6

MEMSCKDGKQPIMDNGKYVRYTPEQVEALERLYHDCPKPSSIRRQQLIRECPI  
LSNIEPKQIKVWFQNRRCREKQRKEASRLQAVNRKLSAMNKLLMEENDRLQ  
KQVSQLVYENGYFRQHTHNTPLATKDTSCESVVTSGQHHLTPQHPPRDASPA  
GLLSIAEETLTEFLSKATGTAVEWVQMPGMKPGPDSSGIVAISHGCAGVGAR  
ACGLVGLEPTRVAEILKDRPSWFRDCRAVDVLNVLPTANGGTIELLYMQLYA  
PTTLAPGRDFWLLRYTSVLEDGSLVVCERSLKNTQNGPSMPPVQHFVRAEML  
PSGYLVRPCEGGGSIHVVDHMDLEPWSVPEVLRPLYESSTVLAQKTTMVALR  
QLRQIAQEASQSNVTNWGRRPAALRALSQLSRGFNEALNGFSDEGWSMIGN  
DGMDDVTILVNSSPDKLMGSNLSFTNGFPAVSSAVLCAKASMLLQNVPPAIL  
LRFLREHRSEWADNNIDAYAAA AVKVGPFSLQGSRVGSFGGQVILPLAHTIE  
HEEFLEVIKLEGVGHSPEDPIMPRDVFLQLCCGMDENAVGTCAELIFAPIDAT  
FADDAPLLPSGFRIIPLDSGKEASSPNRTLDLAAALEVGPAGNRASSDHSANSG  
CTRSVMTIAFEFAFESHMQEHVASMTRQYIRSIISSVQRVALALSPHLGSQAGL  
RSPLGTPEAQTLARWICQSYRSYLGVELLKSNGEGSESILKTLWHHSDAIMCC  
SLKALPIFTFANQAGLDMLETTLVALQDITLEKIFDDHGRKTL CSEFSQIMQQG  
FTCLQGGICLSSMGRPVSYERAVAWKVLNEEENAHHCICFMFINWSFV

>AtNST1

MMSKSMSISVNGQSQVPPGFRFHPTEEEELLQYYLRKKVNSIEIDLDVIRDVDL  
NKLEPWDIQEMCKIGTTPQNDWYFFSHKDKKYPTGTRTNRATAAGFWKATG  
RDKIIYSNGRRIGMRKTLVIFYKGRAPHGQKSDWIMHEYRLDDNIISPEDVTVH  
EVVSIIGEASQDEGWVVCRIFFKKNLHKTLSNPVGGASLSGGGDTPKTTSSQI  
FNEDTLDQFLELMGRSCKEELNLDPFMKLPNLESPNSQAINNCHVSSPDTNHN  
IHVSNVVDTSFVTSWAALDRLVASQLNGPTSYSITAVNESHVGHDLALPSV  
RSPYPSLNRASASYHAGLTQEYTPEMELWNTTSSLSSSPGPFCHVSNGSG

>AtNST2

MNISVNGQSQVPPGFRFHPTEEEELLKYYLRKKISNIKIDLDVIPDIDLNKLEPW  
DIQEMCKIGTTPQNDWYFYSHKDKKYPTGTRTNRATTVGFWKATGRDKTIY  
TNGDRIGMRKTLVIFYKGRAPHGQKSDWIMHEYRLDESVLISSCGDHVDNVE  
TCDVIGSDEGWVVCRVFKKNLCKNMISSSPASSVKTPSFNEETIEQLLEVMG  
QSCCKGEIVLDPFLKLPNLECHNNTTITSYQWLIDDQVNNCHVSKVMDPSFITS  
WAALDRLVASQLNGPNSYSIPAVNETSQSPYHGLNRSGCNTGLTPDYIPEID  
LWNEADFARTTCHLLNGSG

>AtNST3

MADNKVNLSINGQSKVPPGFRFHPTEEEELLHYYLRKKVNSQKIDLDVIREVDL  
NKLEPWDIQEECRIGSTPQNDWYFFSHKDKKYPTGTRTNRATVAGFWKATG  
RDKIICSCVRRIGLRKTLVIFYKGRAPHGQKSDWIMHEYRLDDTPMSNGYADV  
VTEDPMSYNEEGWVVCRVFRKKNYQKIDDCPKITLSSLPDDTEEEKGPTFHN  
TQNVGTGLDHVLLYMDRTGSNICMPESQTTTQHQQDDVLFMQLPSLETPKSESP  
VDQSFLTSPKLDSPVQEKITERPVCSNWASLDRLVAWQLNNGHHNPCHRS  
FDEEEENGDTMMQRWDLHWNNDNDVDLWSSFTESSSSLDPLLHLSV

>NtNST3<sub>sy</sub>

MSKDMNLSVNGQSQVPPGFRFHPTEEEELLHYYLRKKVACEKIDLDVIRDVDL  
NKLEPWDIQEKCRIGGSTPQNDWYFFSHKDKKYPTGTRTNRATAAGFWKAT  
GRDKVIHSNCKRIGMRKTLVIFYKGRAPHGQKSDWIMHEYRLDDNTNPQEA  
VNASESSSPEEGWVVCRVFKKKNYHKALESHPHQSSSAVSIMNSRTLIQKPND  
GVLDQILMYMGRSSCKQQDHENKHNINLVNNINNIHLDDHHMQINSNSFINS  
SGSRFLHLPGLNHHSPPTNMDDDVSSLQLIQQDCSFGHENMLTETEPSSGAG  
PSDWVALDRLVASQLNGHVETSNNLYFPLHNNGLQLRTNGRPNDEDDAFSQ  
SQAAHDDDDVEFWSYARSSSSSPSDPLCHLSV

>NtNST3<sub>to</sub>

MSKDMNLSVNGQSQVPPGFRFHPTEEEELLHYYLRKKVACEKFDLDVIRDVDL  
NKLEPWDIQEKCRIGGSTPQNDWYFFSHKDKKYPTGTRTNRATAAGFWKAT  
GRDKVIHSNCKRIGMSKTLVIFYKGRAPHGQKSDWIMHEYRLDDNTTNPQDA  
VNASESSSPEEGWVVCRVFKKKNYHKALESHPHQSSSAVSIMNSRTLIQKPNN  
DGVLDQILMYMGRSSCKQQDHESKHNINLVNNINNIHLDDHHMQINSNSSFI  
NTNSGTRFLHLPGLNHHSPPTNMDDDVSSLQLIQQDCSFGHENMLTETEPS  
GAGPSDWVALDRLVASQLNGHVETSNNKLYFPLHNNGLQLRTNGRPNDEDD  
AFSQSQAAHDDDDVEFWSYARSSSSSPSDPLCHLSV

>PtrWND1A

MPEDMVNLSINGQSQVPPGFRFHPTEEEELLHYYLRKKVAYERIDLDVIREVDL

NKLEPWDIQEKCKIGSTPQNDWYFFSHKDKKYPTGTRTNRATAAGFWKATG  
RDKIIYSGFKRIGLRKTLVIFYKGRAPHGQKSDWIMHEYRLDDSTHETNVSNI  
GEAIPPEGWVVCVRVFRKKNYQKTLESPKGSSSSLDKSKAHQILGSGNEGVLQI  
LMYMGRTCKMENETFSNMNISNNSNSSLRFLSNNCISEGLHERFMHLPRLES  
PTLPSIPRSPSFDQDRSFISCYHQSYDEMLTENEPSSPNQVGNGIFDMTSSSMT  
DHDSKSGQLNDWVTLDRLVASQLNGHEVETSKQLSCFSTDPNASFGLSPDDG  
MQLSHKQHSHGSSSSNIQANSSHVYSNENDLWSLTKSSSPSSSSDPLCHLSV  
>PtrWND1B

MPEDMMNLSINGQSQVPPGFRFHPTEEEELLHYYLRRKKVAN EKIDLDVIREVD  
LNKLEPWDIQEKCKIGSTPQNDWYFFSHKDKKYPTGTRTNRATAAGFWKAT  
GRDKIIYSGFKRIGLRKTLVIFYRGRAPHGQKSDWIMHEYRLDDSTNDTNVSN  
PIGEAIPPEGWVVCVRVFRKKNYQKTLESPKSSSCSLDSKAHQILGSGNDGVLD  
QILLYMGRTCKMENETFSNMNISNNSNSSLRFLSDNSISDGLHERFMHLPRLDS  
PPLPSIPLSSPSFDQDRSFKSCYHQSYDEMLTENEPSSSNQIGNGTDFMISSSVIH  
GSKSGQLNDWVTLDRLVASQLNGHEAETSKHLSCFTTGPNASFGLSPDDDM  
QLSHLQNSHRSSSNIQANTSHVYTNENDLWGFTKSSSPSSSSDPLCHLSV
