# Supplementary material for: Plant Spacing Effects on Stem Development and Secondary Growth in Nicotiana tabacum
Source: MDPI journal article supplement (doi:10.3390/agronomy13082142), 2023-08-16
Supplement: s1 [file s1]

Archive with 4 entries (4 files):
- agronomy-2518821-supplementary figures.pdf
- Supplementary File S1.pdf
- Supplementary File S2.pdf
- Supplementary File S3.pdf
