# Supplementary material for: Plant Spacing Effects on Stem Development and Secondary Growth in Nicotiana tabacum
Source: MDPI journal article supplement (doi:10.3390/agronomy13082142), 2023-08-16
Supplement: s1 [file s1]

**Supplementary File S2. qRT-PCR primers used in this study.**

| <b>Gene name</b> | <b>Primer sequences (5'→3')</b> |
|------------------|---------------------------------|
| HB8sy-F          | CTTTGTAGTGGAGTGGATGAGAACG       |
| HB8sy-R          | GAAAACCAGAGGGAAGAAGAGGAGC       |
| HB8to-F          | CTCATCCTACTGTCACTGGTTGGG        |
| HB8to-R          | CTGGGTGATGAGTTGACAAGAAGTG       |
| NST3sy-F         | GAAGAAGGGTGGGTGGTGTGT           |
| NST3sy-R         | GTATTTGATCTAGAACGCCGTCG         |
| NST3to-F         | AGGATCGACGCCGCAAAC              |
| NST3to-R         | CCCCGCAGCAGTAGCACG              |
