# Supplementary material for: Plant Spacing Effects on Stem Development and Secondary Growth in Nicotiana tabacum
Source: MDPI journal article supplement (doi:10.3390/agronomy13082142), 2023-08-16
Supplement: s1 [file s1 › Supplementary File S3.pdf]

**Supplementary File S3. Sequences used in *cis*-Acting regulatory element analysis.**

> NtHB8syP

GGAAATGCAGGTGTTTTAACCATGAATATTAATGTAAATTAGCGACTTTG  
AGACAATAGTATATACTATTATATTGCTCATGCTCTTATTTTTTCGAGTTGG  
ACCAACTCAATGATGTGTATTACAAAACAACTTTAAAATTTTTGGGGTTC  
GATTGCACTCTTTATGTTTTCTCGATTTTCTTTTATTTGATCCATTTGAGATG  
AGTTGTGCTAACAATACAACAACACAATTACTTTTGCTCACTAATTTTATG  
CAGACGTGATTACTTCTACTTAAGTCAGTATCAAGAAAACCTTAATTGTCTG  
GATATCTAATATATCATTCTATTTCGCAATACTCAAGGGACTCTTAAAATT  
GTTTTTAGTTCCACATAATACCAACCAAGAGAAAAAGAAGGAAAAGCTAA  
ATAAAAACAAACAAAAGAAGCATGAGTAGCGTCTAAAGATCGAACTTT  
CGGATATATTCTTGTATTCTCACATGGATAAACAACTACTCTTTTGAAG  
AAAAAACAAAGAAACAGAAAATCTTGTTTTATGTCATGCTTTGTTGTGAA  
CATGCCATGTATGTATGATCATGATAATATGATAGTGACAGTGATGAAAG  
AGAAATACTATAAAATAGGTGTGTGGGGGATAGACAGAGCAAAAATCGA  
GGGGGCGCATGCAAAACATCCTCATTATTCTGTCTTCTTTTTCTTTATTTT  
TTTCACTTTGCTTTTACCCCCCTAAGCAATCTTTTTTTTTTTTTTAATTTTC  
CTTTAATATATTTTTAACCCAAGGGTCTGTTACTATATTTTCCATTTCCCC  
CTACGCATGACATATGTCAGTTTGCTCAATTACCCCCTATCTTCCCTGGT  
TTACACTCTTACCATTTCCCCTTTTTCTTGACTCTTTTTTTTCTAATTTCTTCT  
TCTTAAGCAAATTACTAAATTTATATAAATATTGTAGTAAAGAGTGAGTTT  
ACATAAGGTTTATTACAACCTTATAATATATAAGTTGTTAAGAACATATGAC  
TATAGAATTATAAAGAAACAAAAAATCATTCTAGTATTCCTAACTTAGA  
AACACATATTTATTTTTTCGCAATTGATCATATATGCAATAATACAACAATA  
CAATACTAGCCTTGACTTAGCCGAAATTTTTGTTTACAATAAGCGCTACAG  
TATTATATATATAATTAAGAAATATATTACTAAATGTATATGAAATTT  
TCGGTAACTAATACCTTTAAAAAAATATATAGCTCTTCATATAATACAAAT  
TAACAAAATAACGGGTAGCGCAGAATGACTTTCTCTGACAGAGGCTCGC  
TTCTTCAAGTTCAAGTTCAGCTTGTTGCTCCTCATTTTGATAGAAGTAGATT  
CTTGCGAGCTCACTTTTTCTTATTTGTGATATATGGTATTAGGAAAAAGTT  
CATAAAAAACAAAAAGAAAAAAGAAACAAATTATATGAGTAAGATTTA  
CTCATTATTTTATTGGAGAGAGAGAGAGGGGCATTAATGTCAAATAGGGA  
GGACAAACAAAGCAGGAGGCTTACAAGAAGCTCTACCAACTGAAGTGGG  
ATTTTGTGGCTTTTACTTTTGTGTCTGTTACATTCCCATCTTATTCTGATGTT  
TTAGTAGACAGGTTGGTTGTTTTGCAGTGCAAAAGATACCATTACAAAC  
ACTCTCACTGTTCTGCTCCTTTCAACTCTTCTTCTTTTACCTTACCCCTCTTC  
CCCCCCCCCTCCCCAAAAAAACCTCCCAAACCTTCTCCTTTTAAATTAAAAA  
AAACAGAAAAAAGAAAAAGAAAAAAGAAATACTACTACCCCTACTTAGC  
AACACAGCAAACACCATTTGATAATTAGCAAAGTAACCAAAATGGTCTT  
TCCCATTTCTGCTTCCTCTTTCCCCACTCCTCTTTAACTCTCCCTTTGCAT  
ATACATACGAAAAATATATAAAGAAGACCACTCACCTTCCCATTTCTTGTA  
TGTATAGTAATAATACACCTTTCAACTGGTTCTTGAATTCATAGAGAAAGG  
TAGGTTTACAACAACAAAACAAAAAAGATTGTGTTTTAATTATTTTTCTT  
GAGTTTAGAGTTGTGGGAAATTGGTAAGACCGTGATCCGATGATGAAAGA

TCTATGTCTTTGTGCTTGACGCTACTGCTGCGTGGTTTTGAAGGAAGTGGC  
TGAGAATTTGACTACATATTTTTTTTTTTGGGAGAGGATATTTTACAAGGTAG  
CAAATCTTGTGTGTTTTGTCCCCCTTAATTTCTTCGTCTTTGTCTCCTACT  
AATATCTTTGTGTGCTTACATTTCTTGATTTCTAAGGCTTTGAAAGTTTCTA  
TGCTTCAGACACAAGTTTCATTGCATATCCAAATGTTTTTTTTTCCTTAACTT  
TTTATTTTACATGGGATTCTAAAATATTAGTATATATTTAATAGTTGTATC  
TGTCTTTGTATTACATATCTATATGCTATATATACACATGCAGAATTGTT  
AGGAGTTTGTGGGGTTAAGTGGGTAGGAAGGGATTAGCTGTAAATCC  
TTTGTTTATACGTATTATTTTTATTTATCATTTGACTGAAAAAGATTGTCA  
AGTTTGTACAAGTCAAGTCTTCAAATCATCTGTAAAAAAACATAAAAG  
GTAAATGATTTAATTGTGGGAAAGGTAGAAAGATTTAGTAGTTTCTTAA  
AACTTCCTAGCAAACCAAGAATTTTTTTTTGTTTCCTTTAGTATAAATTTTT  
ATTGATGGTTTGGTAACAAGGGGGGATAATTTTGAAATTGGAATTTGTGG  
TATACTATAAGAATTTGGAGAATTTTGTTGAAAGAGAGTAAGGAGTTGTA  
ATATAACAAGATGTTGGAAATGAAGATGAAGCAGGGGAACTCTGTCTTTTG  
AACTCTGTTTGTATGTGAGTAATTCTTTTTTTGGTTCTCAAATTGATTTT  
TATTGAAGTG

> NtHB8toP

TCTGAGGCTCGCTTCAGTCCTGATGCTTGATATCCCGGGCGTGTGCGCCCTT  
TGATATTGTTATCACGTATTGCGATTGTTTCTTTTTATCTTGTCTTTAACCG  
AAAGTCTATCGGAAATAACGCTATGTCCTCTCAAAGTAGAGGTAAGGTCT  
GTGTACACATTATTCTCTCTAGACCCTATTGATGGGAACTTACTGAGTTTG  
TTGTTGTTGTTGAATGACAGTATGTATTACAAAACAACTTAGATCTTTTG  
GGGTTGCGTTGCATTCCTTATGTTTCTCGATTTTCTCTTATTTGATCCACTA  
GAGATGAGTTGTGCCTTTTAAGCGGACATGATTAGTTCTTTTTAAGTTAGT  
ATGAAGAAAACTTATTGGATATCCAACATTATTTTCATTAGCAAAATCCA  
ATGGACTCTTAAAATTGTTTTAGTTAGTTCCATATAATACCAGCCAAGAGA  
AAAAGAAGGAAAAGCTAAATAAAAAACAAAAGAAGCATGAGTAGCTTCTA  
AAAGATCGAACTTTCGGATATATTCTTGTATTTTCACATGGATAAACAAC  
TCTTTTTTTTGAAGAAAAACAAAGGAACAGAAAATCTTGTTTTTATGCCA  
TGCTTTGTTGTGAACATGCCATGTATGAATTGAATGGCAGAAATGATCATG  
ATAATGATGATAGTGACAGTGATGAAAGATAAATAAAATACAGGTGTGTG  
GGGGATAGACAGAGCAAAAATCGAGGGGGCGCATGCAAAACATCCTCAT  
TATTCTGTCTTCTTTTTTCCTTTTTTTTCACTTTGCTTTTCACCCCCCTAAGCAA  
TCACTTTTCCTTTTTTATTTTTTAACCTGAGGTTCTGTTACTATATTTCCCAT  
TCCCACGTACGCATGACATATGTCACTTTGCTCAAACACCCCTTATCTTTC  
CTTGTTTTTACACTATTACCATTTCCACTTTTTCTTGACTCTCTTTTTTCTAT  
TTTCCTTTTCTTAAGCAAATGAAACATAAGAAGGTCTAGAACAAATCACT  
AAATTTATATAATTATTGTAGTAAAGAGTGAGTTTATATGAGGTTTATTAC  
AACTTATAAATAAGAAGTTGTTACAACATATGACTATATAACTATAAGAA  
ACACAAAATCATTTCTAGTATTCCTAACTTAGAAATGACATATTTATTTTT  
CACAATTAATCATATATATAATAATACAGTACTAGTCTTGACTTGCCGAAT  
TTTTTTTGTTTATGACAAGCACTACATTGTGCATATATATATATATATAT  
ATATATATATATATATATATATATATATATATATATATATATATATATACA

TTATAGCTAAATATGAAAATTTTGGAGGTTAATACTTTCAAGAAAAATAC  
ATAGCTCTTCATATAATAACAAATTAACAAGATAAGGGGCTAGCGCGTAAT  
AACTTTCTTTGATAAAGACTTATTTTTTTAAGTTCAAGATCTGCTTGCTGCT  
TCTCATTTTGACAGGAGTAGCTTGCTTGCAGATAGCTCGTTTTTTCTTATTG  
GTGATATATGACATTAGGTAAAAGTTCATAGAAAAACAAAAGAAAAACA  
AAATATGTATGAGTAAGATTTACTTATTATTTTATTGGAGAGAGAGAGAG  
GGGGGCATTAATGTCAAAAAGGGTGGAGAAACAAAGCAGGAGGCTTACA  
AGACGCTCTACCAACTGAAGTGGGATTTTGTGGCTTTTACTTTTTTGTCTCT  
CACATTCCCATCTTATTCTGATGTTTTAGTACAGAGACAGATTGGTTGTTTT  
GCAGTGGAAAAGATAACCATTACAAACACTCTCACTGTTCTGCTCCTTTCA  
ACTCTTTTACCTTTAACCCCCCTCCCCCTCCCCACAACCCCCCCCCCAAA  
AGACCAACTTCTCCTTCTTATAAAAAAGAAAAAGAAAAAGAAATATTAC  
CCCTACTTAGCAACAACAGCAAACACCATTGATTATTTGCAAAGTAACC  
AAAATGGTCTTTCCCATTTCTGCTTCCTCTTTCCCACTTCTCTTTAAACTC  
TTCCCTTTGCATATACATACGAAAAATATAAAGAAGACCACTCACCTTCCC  
ATTCTTGTATGTATAGTATTAATAATACACCTTTCAATAGTTTTAGCTGGTT  
CTTGAATTCATAGAGAAAGGTAGGTTTACAAAAAAAAGAAGATTGTGTTT  
TATTATATTTTCTTGAGTTTAGAGTTGTGGGAAATTGGTAAAACCGTGATC  
CGATGATGAAAGATCTATGTCTTTGTGCTTGACGCTACTGCTGCGTGGTTT  
TGAAGGAAGTGGCTGAGAATTTGACGACAGATTTTTTGGGAGAGTAAATT  
TTACAAGGTAGCAAATCTTGTGTGTTTTGTACCCCCCTTAATTTCTTCGTCT  
TTGTCTCCTACTAATATCTTTGTGTGTTTACATTTCTTGATTTCTAAGGCTT  
TGAAAGTTGCTATGCTTCAGACACAAGTTTCATTGCATATCCAAATGTTTT  
ATTTTCTTAACCTTTTCATTTTCACATGGGATTCTAAAATATTAGTGATATAT  
TTAATAGTTGTATCTGCCTTTGTATTCACATATGTATATGCTATATATACAC  
ATGCAGAAATGTTAGGAGTTTGTGGGTTAAGTTGGTAGGAAGGGATTT  
AGCTGTAAATCCTTTGTTTATATTATTTTTATTTATCATTGACTGAAAAA  
GAATTGTCACGTTTGTACAAGTCAAGTGTTCAAATCATCTGCAAAAGCA  
GAAAAGGAAAATGATTTAATTGTGGGGAAGTGAAGAAAGCTTTAGTAGTT  
TCTTCAACCTTCCTAGCAAACCAAGGAAGATTTGATGGTTTGGTAACAAG  
GGGGGATAATTTTGAATTTGGAATTCGTGGTATACTATAAGAATTTTGAGA  
ATTTTGTTGAAAGAGAGCAAGGAGTTGAAATAACAAGATGTTGGAAATG  
AAGATGAAGCAGGGGAAGTCTGTCTTTTGAAGTCTATTTGTTATGTTATAA  
TTCCTTTTTTTTTTTGGTTCTCAAATGATTTTCATTGAAGTG

> NtNST3syP

AAATCCCTCAAGTTTCATCATCGTAGATGTTTAACTCCGAGTAAAAAGCAT  
GCCCTTGCGGAGTGACGAAATATGGATATCTTCCAGTTACTTTAAGTATCA  
CTCGGTGTTTGCTCACACTTATTTTTTTGCATAACAACGATATCAATTTATC  
GTACTCCATTATAAGTGCTAATTTAATATGCCCCGTGGAGATAAACTATAT  
CTCACTGAGTTATTCTCCATCACAACTGAACTCTTATTCTACGCTCTTC  
AGATATTACGAAAAAATGCTTGAGAATTAAACAATAAGAAAATATTGAAT  
TGGATGAATCTTTTGTGAATGGATTTTCCTAAAATCCTAACGCCCTTTATA  
TAGGAAATGTGCGAGCCCGAGAGTTAAATTTTTTGATGTATAGCGCTCGTT  
GAATATACGCTATACAAATTTCAATTATTGGTGGGCCCATAATTAGGGGT

ATAGCGTGCTGTATTTATACGCTATATATAGCGTGCAAATACAACACGCT  
ATACCTATGTCAGTATATATAACGCCAAGTTACACCACGCTATACCTTAAC  
GGCAAAAGTTACCGTTAAGGTATGGCGTGGTGTAACTTGGCGTTATATAT  
ATAAATGTAAATTTTTTTAGACTTATTTGTGTATCTTTGTCCAAAAAGAC  
AAGGCAAAATACATAAGTTGCCACCTGAACTATCACCCAAATCCCTGTTA  
CACACTTCCAGGAACGAATATTACTTTACACACCCCAATCTTTCCAAAGTG  
TATCTAAGACGCACCATTTTTTTCTTAACCAGTTTTTCAGAATATGTGCAA  
TATCATGCACCATTCAAACAATGACACGTGTCATTTTAAAAAAAAAAATT  
AAAATTACAATTATACCCCTCATCTTCCTCTAAACTACCATGGTCGTCTTC  
CTCCTCTCTCACCATCAAACACCATAGCTTCTTCCTCCATCTTTTACTTAAT  
AATAAAGCCACCATTAATTAACAAAAATCACCAGAAAACACATTCAAAGC  
TCCATCTTTTTTCGCTGAAATTGAATCAAAATTTTTGAGCTCAGATCCAAC  
CATTTTTTCATTTCACTTCGGTAAAAGTTCGACCGCCATTAAGTCCATCGC  
CACAAGTCAACTATTTAAAAATCATCCATTAATAAAATTAAAGAATGTGC  
AAAATCTTGAGCTAAGCTTTAATGGTTGGAAAAAATTTGAAAAATTCTC  
GCTTCCTAAAAATTTGACTTCGCCACGGGTAAAGCTCAAGTTAAGCTTCTC  
TACAACGAGAAGAGATATAAGAAATCGTGGTATATCTATTTGAGAAGAAG  
GAGATCGGGTGGTGGAGCTCAAGGAGTAGCTATGGCAGAATTTTTAAAAA  
GGAAGAAGATGACTCAATTTAAAATTTTAAAAAACTAAAAAAAAATTGAC  
ATCTGACATAAAATTCTTCTGTTCACGCGACTTATTTGTTGGAAAAAACAC  
GCACTATCCACGTGGGCAAAGCAGTGTGTATTAGATACTTTAGAAATG  
TTGGGTGTGTAAAGTAATATTCGTTCTTAGAAAAATGTGTAACATGGATCTG  
GGTCATATTTTCGGGGGTAACCTATGTATTTTGCCAAAAGACAACAAAAG  
GTTCCGACTCTTTGCATGGTACGTACTATTACGAAGTGCGTCAGACCTTTT  
TGTAATCAAAAAATTAATAAAATCGCAGATGAAATGATGCGGTGTTTTTT  
GTAGTCAGTACTCAAAATGATCAATTGGGAAAGAAAAAGTAAAGAAAGA  
AAATATATGCAATCCCTATTTCCCTTTTTATAACTCTATTTGGATGGACCATC  
AATGGATGAAAGCGCAACTCATCCCAACCCCACTCTCTCGCCGTCTT  
GTCGTTAGTGTTAGTTGCACGAGTAAAATGAGTGATAGAGAGAGGTAGCG  
CGCAAGGGAGATTTCCCTTGGGATAATGGTGGTTTCGAGGGAGCTTTTCTTG  
AGATTTTAAGGTCGAAGGTCATTGTTTCTTGATGTAGGGTACCCCACTCAT  
GGAATTTGGGAACCCTAGCCCCACTCCGAACAATAAGGTCCCTCAAATTA  
AAAGATATTTGCACAATCAATTTATATATAAGATAATTATAGGTAAATTTT  
TATCACAAATATTACTCTTTCCGTTTCAATTTATGTGAATCTGTTTGACTGG  
ACACGAAGTTTAAGAAAAAATGAAAACCTTTTGGAATTTGTGGTTCGAAACA  
AGTCAAAAAGAGACCCAGAGTATTTGTGTGGTTATAAAAGCTTCTTATTA  
AGGGTAGAATTATAAGTTTAAGCTAAATTGTTACCAAATTTATAAAGAAA  
TCATTCTTTTTTGAACGGACCAAAAAAAAAAATAGGTTACGTAAACGGAAA  
CAGAGGGAGTACTTTCTTCATTTTAATTTATGTGGCGATGTTGATTGACGT  
ATAGATTATGAAAAAAAATATTTATTAATATTTTCGGTTAAAAACAAGTCA  
TAAACATTTATGTGACTATAAATTATTTCAATTAAGAATAAAATTGAAAGTT  
TAAATTAATTTATTTCAAATAAGGAAGTATGATATTTTAATAGATTAGAC  
TAAATGAAAAGTATACTCCATATTTGTTTTCACTCTCTCTGAATATAATG  
GTGGTTGATTCTATCTTAGAAGCAGAAGACCCCACTGTAAAAGTACA

CCAATGGCGATGATACGAACCTTTTCATGCATCTACAGACCCTTTTGTGTC  
CCTAACTACTGCATATAAATGATCATGTTTCCTCCCTTCCCTTTTTTAACTC  
CCACACGCTACATTCCTCTCTCATTTTTTTTTTTCACACCTTAATTCATCTATT  
ACTTTCTCAATCTTTTTTATATCACATTCTCTCACCACCCTTTCCCTTTTATA  
GGGAATAAAATTAAGGTGAACTCCACATCTTTCTTTTACAGCTCTATCTC  
TTTTTGATATAACATTTGATGTCAAAAGACATGAATCTATCAGTAAATGGG  
CAATCTCAAGTGCCTC

> NtNST3toP

ACTACTCTTGATGATAGACTTAAGTTAATGGGAAAGTAACACTTCTAAAT  
AGTTTGCAATTATTATATGGGAATTAAGTAGTTGTACTCTTTTCCTATTTTGA  
AAATTTTAATATAGACATGTAATTTTCGTACAATAGCTAAACAACATTGAC  
AATATTATATTTTTATAAAAAATGAGTATAACAAGCGGGGCGTCACCATTTC  
CGTACATATGGCACAGAAATGGCAAAAAATGAAGAATGTCCAATAGCAC  
ATATTACTCAGTACTATATTCATTTGTACAGATCAAACGAAATGAAATGA  
AAGTTTCCTTGTGTTGGGTGCAGTTCATTCATTCAGTGAGGCAATAATATA  
CATATAGTTTGATAGTCTTTGCATGGTACGTACTATTACGAAGTGCAGTCAG  
ATTTATATGACCGCAAAAAATAAAGTCGTAGATGAAATGATGTAGTCGGT  
ACTCAAAATGATCAATTGGGAAAGAAAATGTTAAGAAAGAAAATATATG  
CAATCCCTATTTCTTTTTATAACTCTCTAATTTGGATGGACCATCAATGG  
ATGAAAGCGCAACTCCTCCGAACCCCACTCTCTCGCCGTCTTGTCGTT  
AGTGTTAGTTGCACGAGTAAAATGAGTGATAGAGAGAGGGGAGATTTCTT  
GGGATAGTGGTGGTTTCGAGGGAGCTTTTCTTGAGATTTTAAGGTCTGAAC  
GTCATTGTTTCTTGACGTAGGGTACCCCACTCATGGAATTTGGGAATCCCT  
AACCCCACTCGGAACAATAAAGTCCCTCAAATGAGACTGACGTTGAAAAT  
ATTTACACTATAATTATAGGTAAATTTTTGTAAAAATATTACTCCATCTT  
AATTTATATGGAGGTGTCGCCTCACAAAGGGAAAAAAATATTTACTAACA  
TTATGGCAAAAAAAGTCATAAACATTTATGTGATTATAAATTATTTCAAT  
AAGAATAAAATTGAAAGTTTAAATTATAATATCTCTAATAAAAAAGTAAG  
ATGTTGCTCCCAAATGCACATGCAAATATACATGATCAACAAGTAATATT  
ATAATAAGTAGAGTGTCGAACCCAACTTGTGTAACTACTTACTAATTTT  
ACTCTAATTGTTATCTAGTTGACTCAATCAAAGTTGACTTGAGTGATTATA  
ACTAAGCAGTGAATGTAACAATTAATAATTTAGCAAGTAATAAATGGTT  
GTTGAGAGTTTCAAGTACGTAGAGATAAATATTTTCAAGGTTGTGATCGATT  
ACCAATCCTATTGTGTTCTAATTAACCTCTCTTCTCATACAATTCGCTTATG  
GTTGCTAATTAATTGAGTAATTGCTCTCGTAGCATTCTCCCGAATTACTAC  
TCACCTATTAATAAATATATTAACCTCCTATATTCCTATGAAATCAATCTATC  
AATAACGCATTAAAGATTCCGATATTAAATTAAGCATGGTGATTAGGTATA  
ATCCTATCCTAGCCACAAATCCGTCTCCACTTTAGAGTTAAGATCATGTAG  
TATTCGATTCTTCTCTAATCTAAATATAGCTTTCCCAAGTATAATCCATATA  
GTTGATAGAACTTAATTATTGGCCAGACAATCAAGCAATTAAACACAGAA  
TTGAAGAAACAACCTATATATTAGCAAATTATAATATAGAAAAAGTCAACT  
TCGAACAACAATATTCATTACTAAATCACAATTCCAGAACGAATAGGTCT  
TAGCCACTCATGATAAAGTTAAATAATTTCACTAAGTGTTTGAATTGTTGA  
AAATATTAAGAAAGATGAAGAAAAACTGAGAATCCATGCTCCCGAGTGTT

CCGTGCTTGTGTTTTTCTCTCAAAGTGGTGTTCCTCCAAAATAGATTT  
AGACTTATTTTTTATATGAGTTGGGGTGTGTAGGACCAAAAAACCTTGTCG  
TGAGCGAAGTGGGGAAAAATTCCCGCTACCCAGCGTCTAGGGCAGCACG  
ACGCGCTGGCCTGGGCAGTTTTCTTCCTTTGTTCTCTTTTTGCTTCAAATTG  
TGCACTTTCGTCCACATTATTTTCGGGTGACTCCTACACATAAAAAATAC  
TACAAATTAGCATAAATCATCATATTACACATAAAAAATTCCATAAAATAT  
GAGTAAAATGCGAGGCAACATACAGATAAATATACATACTTTAAGCCAAA  
TATTTAATGTTTTAGTGAAGTGAATAAAAAGGAAATTACGTTACCTAAAC  
GGAGGAGGAGAGAGTAAGAGCTCTAGTCTCTTGTACCTTTCAATTAGTTTC  
TATTCACACCGTCCCATTTTTATGTGAAGGTTCTATTGCTTGGGAAGTCAA  
CATTTTTTTATTAAGATTTTTCTCAAACCTTCTTAAATATTTTGAATACTTTAC  
ATTAGGTTTCTAGTACATAAATTTTTATTTTAAGAGATTGAAGAATCCATGC  
TCAAATTCCATAAAATACTACGTATATGCTTTCTCGTAATCCAAACTTTGC  
ATAAATTAGGATAGAACGAGTATTTGTTCTATATTTATTAATTCTCACTCT  
CTCTGAATATAAGGGTGGTTGATTCTATCTTAGTAGCCTAAGACCCACCA  
CTGTAAAAGTACACTAATGGCCATGATACGAACCTTTTCATGCATCTACA  
GACCCTTTTGTGTCCCTAACTACTGCATATAAATGATCATGTTTCCTCCCTT  
CCCTTTTTTAACTCCCACACGCTACCATCCTCTCTCATTTTCTCAACTTCAC  
ACCTTCTCTATTACTTTCTCAATCTGTTTAGATCACATTCTCTCACCACCCT  
TTCCTTCCTAAGCTGCCCTTTTATAGGAAAACAAATTACGGTGAAGTCCA  
CATCTTTCTTTTCCAGCTCTTTCCATCTGTTTTTAATTTCCCCCTATTCAAT  
CCGCAGTGTAGCCTCTCTTACAAGTACGGGTGATATAACAATATTGATGT  
CAAAAGACATGAATCTATCAGTAAATGGGCAATCTCAAGGCCT
